# Supplementary material for: The Prognostic Value of Pre-Treatment Circulating Biomarkers of Systemic Inflammation (CRP, dNLR, YKL-40, and IL-6) in Vulnerable Older Patients with Metastatic Colorectal Cancer Receiving Palliative Chemotherapy—The Randomized NORDIC9-Study
Source: MDPI journal article supplement (doi:10.3390/jcm11195603), 2022-09-23
Supplement: s1 [file s1]

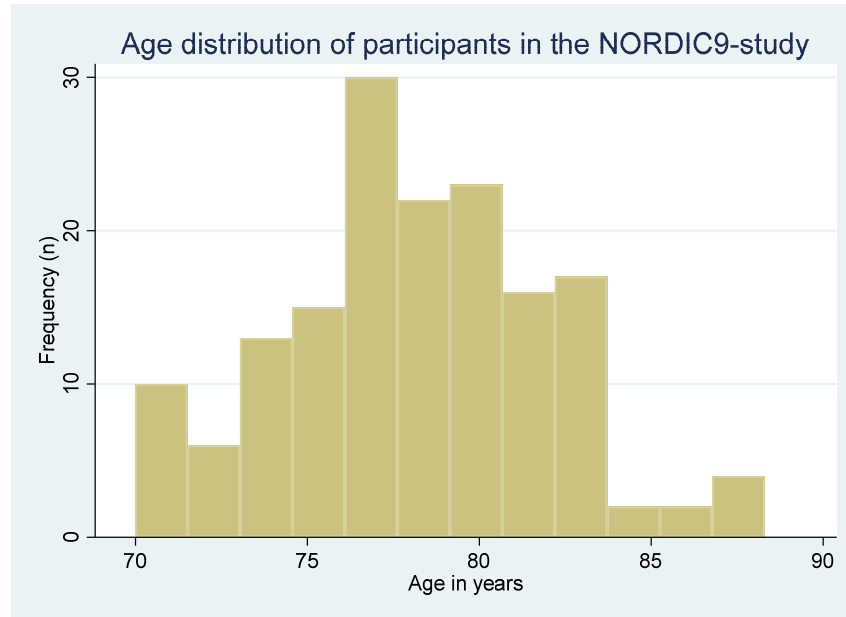

**Supplementary Figure S1.** Age distribution of older fragile patients with metastatic colorectal cancer included in the randomized NORDIC9-study.

| Biomarker     | n  | Progression-free Survival |             |         | Overall Survival |             |         |
|---------------|----|---------------------------|-------------|---------|------------------|-------------|---------|
|               |    | Hazard ratio              | 95% CI      | p-value | Hazard ratio     | 95% CI      | p-value |
| CRP (mg/L)    |    |                           |             |         |                  |             |         |
| ≤ 10          | 66 | 1.85                      | (1.32-2.58) | <0.001  | 3.36             | (2.23-5.08) | <0.001  |
| > 10          | 86 |                           |             |         |                  |             |         |
| dNLR          |    |                           |             |         |                  |             |         |
| ≤ 2.2         | 79 | 1.42                      | (1.03-1.96) | 0.034   | 1.89             | (1.29-2.75) | 0.001   |
| > 2.2         | 78 |                           |             |         |                  |             |         |
| YKL-40 (μg/L) |    |                           |             |         |                  |             |         |
| ≤ 200         | 72 | 1.40                      | (0.97-2.00) | 0.069   | 1.81             | (1.20-2.74) | 0.005   |
| > 200         | 56 |                           |             |         |                  |             |         |
| IL-6 (ng/L)   |    |                           |             |         |                  |             |         |
| ≤ 4.5         | 47 | 1.52                      | (1.04-2.21) | 0.030   | 1.55             | (0.99-2.42) | 0.053   |
| > 4.5         | 81 |                           |             |         |                  |             |         |

**Supplementary Table S1.** Univariate cox analysis of inflammatory biomarkers CRP, dNLR, YKL-40, and IL-6 on progression-free survival and overall survival in the NORDIC9-study.

NA: Non-applicable.

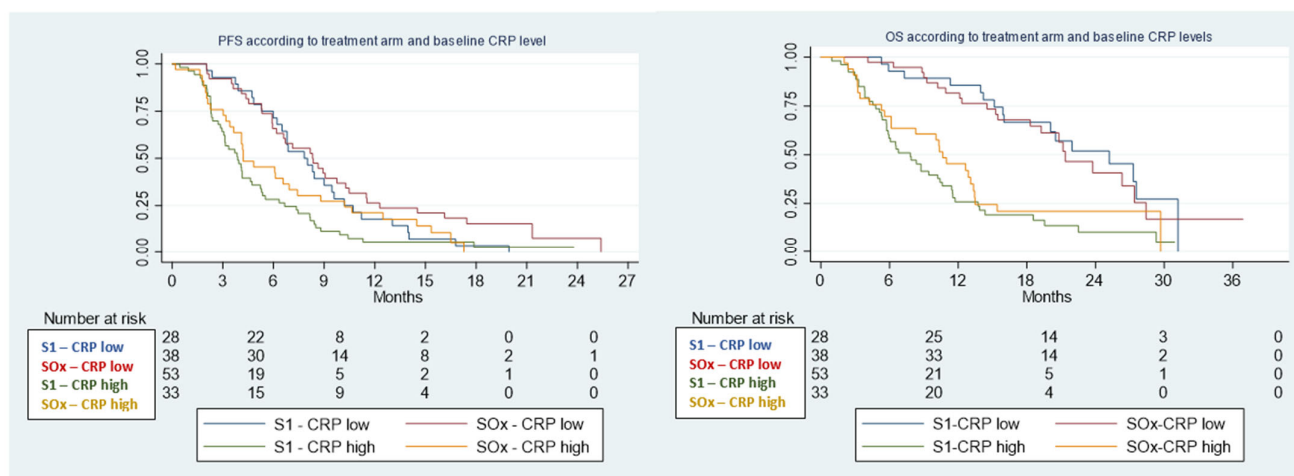

**Supplementary Figure S2.** Kaplan-Meier survival curves demonstrating progression-free survival and overall survival stratified by treatment arm and baseline CRP levels.

| Progression-free survival    |                                     |                                 |              | Overall Survival             |                                 |                                 |                  |
|------------------------------|-------------------------------------|---------------------------------|--------------|------------------------------|---------------------------------|---------------------------------|------------------|
| Treatment arm<br>- CRP level | Median<br>PFS<br>(months)<br>95% CI | Hazard<br>ratio<br>95% CI       | p-value      | Treatment arm<br>- CRP level | Median OS<br>(months)<br>95% CI | Hazard<br>ratio<br>95% CI       | p-value          |
| S1- CRP low                  | 7.8<br>6.2-9.5                      | 1.00                            | NA           | S1- CRP low                  | 25.2<br>15.9-NC                 | 1.00                            | NA               |
| SOx – CRP low                | 8.3<br>5.9-10.3                     | 0.74<br>0.44-1.23               | 0.242        | SOx – CRP low                | 21.4<br>18.3-27.4               | 1.09<br>0.57-2.08               | 0.805            |
| S1 – CRP high                | <b>3.9</b><br><b>2.9-4.7</b>        | <b>1.82</b><br><b>1.14-2.89</b> | <b>0.012</b> | S1 – CRP high                | <b>7.8</b><br><b>5.8-10.4</b>   | <b>3.85</b><br><b>2.15-6.90</b> | <b>&lt;0.001</b> |
| SOx – CRP high               | 4.2<br>3.4-6.9                      | 1.26<br>0.75-2.10               | 0.379        | SOx – CRP high               | <b>10.6</b><br><b>6.1-13.3</b>  | <b>3.07</b><br><b>1.62-5.79</b> | <b>0.001</b>     |

**Supplementary Table S2.** Progression-free survival and overall survival according to treatment arm and baseline CRP levels. Overall survival was significant shorter in patients with high CRP levels regardless treatment arm.

NA: not applicable

NC: not calculated
